# Supplementary material
Source: ML conference proceedings conference paper supplement (https://openaccess.thecvf.com/content/CVPRW_2020/html/Prasad_CascadeTabNet_An_Approach_CVPRW_2020_paper.html)
Supplement: Supplementary file 1 [file Prasad_CascadeTabNet_An_Approach_CVPRW_2020_supplemental.pdf]

## 1. Retina Net ( Retina )

### Model Configuration:-

[https://github.com/open-mmlab/mmdetection/blob/master/configs/retinanet\\_x101\\_32x4d\\_fpn\\_1x.py](https://github.com/open-mmlab/mmdetection/blob/master/configs/retinanet_x101_32x4d_fpn_1x.py)

### Evaluation Table:-

| Epoch | IOU             |                 |                 |                |
|-------|-----------------|-----------------|-----------------|----------------|
|       | 0.6             | 0.7             | 0.8             | 0.9            |
| 1     | 0.30836         | 0.287369        | 0.212812        | 0.070937       |
| 2     | 0.306977        | 0.292665        | 0.257603        | 0.147406       |
| 3     | 0.24834         | 0.239677        | 0.218308        | 0.125325       |
| 4     | 0.481253        | 0.465585        | 0.420817        | 0.297706       |
| 5     | 0.503137        | 0.489447        | 0.463206        | 0.36737        |
| 6     | 0.170798        | 0.164214        | 0.149497        | 0.106894       |
| 7     | 0.596206        | 0.577236        | 0.544715        | 0.45122        |
| 8     | 0.495803        | 0.477896        | 0.453274        | 0.351427       |
| 9     | 0.766404        | 0.741907        | 0.710411        | 0.598425       |
| 10    | 0.795247        | 0.767824        | 0.744059        | 0.647166       |
| 11    | 0.800735        | 0.77686         | 0.751148        | 0.653811       |
| 12    | 0.792384        | 0.768812        | 0.739801        | 0.645512       |
| 13    | 0.80367         | 0.776147        | 0.752294        | 0.655046       |
| 14    | 0.80663         | 0.779006        | 0.755064        | 0.655617       |
| 15    | 0.810711        | 0.781163        | 0.755309        | 0.655586       |
| 16    | 0.812963        | 0.781481        | 0.757407        | 0.655556       |
| 17    | 0.807728        | 0.776449        | 0.75253         | 0.655014       |
| 18    | 0.81146         | 0.780037        | 0.756007        | 0.658041       |
| 19    | 0.816744        | 0.785116        | 0.75907         | 0.662326       |
| 20    | 0.817505        | 0.785847        | 0.761639        | 0.664804       |
| 21    | 0.813716        | 0.780352        | 0.758109        | 0.656163       |
| 22    | <b>0.818267</b> | <b>0.784716</b> | <b>0.762349</b> | <b>0.66356</b> |

## 1. Faster RCNN Hrnet (FRcnnHr)

### Model Configuration:-

[https://github.com/open-mmlab/mmdetection/blob/master/configs/hrnet/faster\\_rcnn\\_hrnetv2p\\_w40\\_1x.py](https://github.com/open-mmlab/mmdetection/blob/master/configs/hrnet/faster_rcnn_hrnetv2p_w40_1x.py)

### Evaluation Table:-

| EPOCH | IOU             |                 |                 |                 |
|-------|-----------------|-----------------|-----------------|-----------------|
|       | 0.6             | 0.7             | 0.8             | 0.9             |
| 1     | 0.420332        | 0.396872        | 0.338221        | 0.131965        |
| 2     | 0.604488        | 0.584853        | 0.537167        | 0.29453         |
| 3     | 0.649624        | 0.634586        | 0.57594         | 0.323308        |
| 4     | 0.693651        | 0.677778        | 0.650794        | 0.455556        |
| 5     | 0.782847        | 0.766423        | 0.740876        | 0.600365        |
| 6     | 0.774888        | 0.764126        | 0.728251        | 0.575785        |
| 7     | 0.775658        | 0.764759        | 0.730245        | 0.564941        |
| 8     | 0.846457        | 0.832677        | 0.814961        | 0.663386        |
| 9     | 0.884974        | 0.874611        | 0.864249        | 0.770984        |
| 10    | 0.881565        | 0.875386        | 0.858908        | 0.762101        |
| 11    | 0.89234         | 0.879917        | 0.867495        | 0.778468        |
| 12    | 0.888199        | 0.877847        | 0.861284        | 0.772257        |
| 13    | <b>0.889119</b> | <b>0.876684</b> | <b>0.862176</b> | <b>0.781347</b> |

### 3.Cascade RCNN X101 (CRcnnX )

#### Model Configuration:-

[https://github.com/open-mmlab/mmdetection/blob/master/configs/cascade\\_rcnn\\_x101\\_64x4d\\_fpn\\_1x.py](https://github.com/open-mmlab/mmdetection/blob/master/configs/cascade_rcnn_x101_64x4d_fpn_1x.py)

#### Evaluation Table:-

| EPOCH | IOU             |                |                 |                 |
|-------|-----------------|----------------|-----------------|-----------------|
|       | 0.6             | 0.7            | 0.8             | 0.9             |
| 1     | 0.420332        | 0.396872       | 0.338221        | 0.131965        |
| 2     | 0.604488        | 0.584853       | 0.537167        | 0.29453         |
| 3     | 0.649624        | 0.634586       | 0.57594         | 0.323308        |
| 4     | 0.693651        | 0.677778       | 0.650794        | 0.455556        |
| 5     | 0.782847        | 0.766423       | 0.740876        | 0.600365        |
| 6     | 0.774888        | 0.764126       | 0.728251        | 0.575785        |
| 7     | 0.775658        | 0.764759       | 0.730245        | 0.564941        |
| 8     | 0.846457        | 0.832677       | 0.814961        | 0.663386        |
| 9     | 0.884974        | 0.874611       | 0.864249        | 0.770984        |
| 10    | 0.881565        | 0.875386       | 0.858908        | 0.762101        |
| 11    | 0.926407        | 0.91342        | 0.900433        | 0.854978        |
| 12    | 0.922246        | 0.909287       | 0.898488        | 0.850972        |
| 13    | 0.927411        | 0.912243       | 0.901408        | 0.853738        |
| 14    | 0.926407        | 0.911255       | 0.900433        | 0.850649        |
| 15    | 0.928416        | 0.913232       | 0.902386        | 0.854664        |
| 16    | 0.928416        | 0.913232       | 0.902386        | 0.854664        |
| 17    | <b>0.928571</b> | <b>0.91342</b> | <b>0.902597</b> | <b>0.852814</b> |

## 4.Cascade RCNN Hrnet (CRccnHR )

### Model Configuration:-

[https://github.com/open-mmlab/mmdetection/blob/master/configs/hrnet/cascade\\_rcnn\\_hrnetv2p\\_w32\\_20e.py](https://github.com/open-mmlab/mmdetection/blob/master/configs/hrnet/cascade_rcnn_hrnetv2p_w32_20e.py)

### Evaluation Table:-

| EPOCH | IOU             |                 |                 |                 |
|-------|-----------------|-----------------|-----------------|-----------------|
|       | 0.6             | 0.7             | 0.8             | 0.9             |
| 1     | 0.543803        | 0.521739        | 0.462038        | 0.2427          |
| 2     | 0.639579        | 0.630549        | 0.606471        | 0.41836         |
| 3     | 0.672496        | 0.659777        | 0.63275         | 0.511924        |
| 4     | 0.772365        | 0.761736        | 0.735164        | 0.632418        |
| 5     | 0.757785        | 0.738754        | 0.723183        | 0.615917        |
| 6     | 0.826291        | 0.811268        | 0.773709        | 0.666667        |
| 7     | 0.820305        | 0.810152        | 0.79797         | 0.716751        |
| 8     | 0.800735        | 0.786042        | 0.764004        | 0.685032        |
| 9     | 0.794895        | 0.783956        | 0.763902        | 0.694622        |
| 10    | 0.879346        | 0.858896        | 0.850716        | 0.791411        |
| 11    | 0.894628        | 0.884298        | 0.865702        | 0.793388        |
| 12    | <b>0.927039</b> | <b>0.909871</b> | <b>0.901288</b> | <b>0.832618</b> |
| 13    | 0.915966        | 0.901261        | 0.884454        | 0.821429        |
| 14    | 0.883011        | 0.868769        | 0.852492        | 0.793489        |
| 15    | 0.918977        | 0.906183        | 0.886994        | 0.831557        |
| 16    | 0.851312        | 0.835763        | 0.816327        | 0.75413         |
| 17    | 0.904512        | 0.885624        | 0.873033        | 0.833158        |
| 18    | 0.911392        | 0.894515        | 0.881857        | 0.839662        |
| 19    | 0.917998        | 0.903088        | 0.888179        | 0.841321        |
| 20    | 0.918977        | 0.901919        | 0.886994        | 0.835821        |
| 21    | 0.917998        | 0.903088        | 0.886049        | 0.839191        |

## 5.Cascade Mask RCNN Deformable Convolution (CMRcnnDC)

### Model Configuration:-

[https://github.com/open-mmlab/mmdetection/blob/master/configs/dcn/cascade\\_mask\\_rcnn\\_dconv\\_c3-c5\\_r50\\_fpn\\_1x.py](https://github.com/open-mmlab/mmdetection/blob/master/configs/dcn/cascade_mask_rcnn_dconv_c3-c5_r50_fpn_1x.py)

### Evaluation Table:-

| EPOCH | IOU             |                 |                 |                 |
|-------|-----------------|-----------------|-----------------|-----------------|
|       | 0.6             | 0.7             | 0.8             | 0.9             |
| 1     | 0.654659        | 0.632733        | 0.598277        | 0.443226        |
| 2     | 0.771583        | 0.755396        | 0.732014        | 0.663669        |
| 3     | 0.794521        | 0.779909        | 0.767123        | 0.703196        |
| 4     | 0.713001        | 0.691742        | 0.68193         | 0.591987        |
| 5     | 0.857424        | 0.849558        | 0.829892        | 0.764995        |
| 6     | 0.832061        | 0.820611        | 0.801527        | 0.740458        |
| 7     | 0.861966        | 0.852036        | 0.82423         | 0.762661        |
| 8     | 0.857988        | 0.842209        | 0.822485        | 0.763314        |
| 9     | <b>0.902287</b> | <b>0.885655</b> | <b>0.866944</b> | <b>0.839917</b> |
| 10    | 0.90135         | 0.886812        | 0.86812         | 0.82243         |
| 11    | 0.902287        | 0.887734        | 0.871102        | 0.829522        |
| 12    | 0.907001        | 0.890282        | 0.873563        | 0.833856        |
| 13    | 0.907001        | 0.890282        | 0.873563        | 0.835946        |
| 14    | 0.908901        | 0.894241        | 0.875393        | 0.835602        |
| 15    | 0.909853        | 0.895178        | 0.878407        | 0.836478        |
| 16    | 0.908901        | 0.894241        | 0.879581        | 0.835602        |
| 17    | 0.910808        | 0.896118        | 0.881427        | 0.835257        |
| 18    | 0.910808        | 0.896118        | 0.879328        | 0.837356        |
| 19    | 0.909853        | 0.895178        | 0.878407        | 0.836478        |
| 20    | 0.909853        | 0.895178        | 0.878407        | 0.836478        |
| 21    | 0.90795         | 0.893305        | 0.876569        | 0.834728        |
| 22    | 0.910808        | 0.896118        | 0.879328        | 0.837356        |
| 23    | 0.908901        | 0.894241        | 0.877487        | 0.831414        |
| 24    | 0.910808        | 0.896118        | 0.879328        | 0.835257        |
| 25    | 0.908901        | 0.894241        | 0.877487        | 0.833508        |
| 26    | 0.909853        | 0.895178        | 0.878407        | 0.834382        |
| 27    | <b>0.911765</b> | <b>0.897059</b> | <b>0.880252</b> | <b>0.834034</b> |

## 6.Cascade Mask RCNN X101 (CMRcnnX )

### Model Configuration:-

[https://github.com/open-mmlab/mmdetection/blob/master/configs/cascade\\_mask\\_rcnn\\_x101\\_64x4d\\_fpn\\_1x.py](https://github.com/open-mmlab/mmdetection/blob/master/configs/cascade_mask_rcnn_x101_64x4d_fpn_1x.py)

### Evaluation Table:-

| EPOCH | IOU      |          |          |          |
|-------|----------|----------|----------|----------|
|       | 0.6      | 0.7      | 0.8      | 0.9      |
| 1     | 0.681423 | 0.662451 | 0.63083  | 0.531225 |
| 2     | 0.736842 | 0.723037 | 0.709232 | 0.543572 |
| 3     | 0.815311 | 0.798086 | 0.786603 | 0.725359 |
| 4     | 0.852295 | 0.846307 | 0.832335 | 0.740519 |
| 5     | 0.8583   | 0.846154 | 0.834008 | 0.791498 |
| 6     | 0.895769 | 0.887513 | 0.877193 | 0.819401 |
| 7     | 0.892147 | 0.885864 | 0.873298 | 0.839791 |
| 8     | 0.875127 | 0.864975 | 0.84264  | 0.8      |
| 9     | 0.931298 | 0.924755 | 0.909487 | 0.868048 |
| 10    | 0.927095 | 0.91839  | 0.905332 | 0.85963  |
| 11    | 0.928261 | 0.917391 | 0.904348 | 0.86087  |
| 12    | 0.929117 | 0.920393 | 0.907306 | 0.861505 |
| 13    | 0.932314 | 0.923581 | 0.908297 | 0.866812 |
| 14    | 0.931148 | 0.922404 | 0.90929  | 0.86776  |
| 15    | 0.929117 | 0.920393 | 0.907306 | 0.863686 |
| 16    | 0.931148 | 0.922404 | 0.90929  | 0.865574 |
| 17    | 0.930131 | 0.921397 | 0.908297 | 0.864629 |
| 18    | 0.930131 | 0.921397 | 0.908297 | 0.862445 |
| 19    | 0.931148 | 0.922404 | 0.90929  | 0.863388 |
| 20    | 0.931148 | 0.922404 | 0.90929  | 0.863388 |
| 21    | 0.931148 | 0.922404 | 0.90929  | 0.863388 |

## 7.Cascade Mask RCNN Hrnet (CMRcnnHR )

### Model Configuration:-

[https://github.com/open-mmlab/mmdetection/blob/master/configs/hrnet/cascade\\_mask\\_rcnn\\_hrnetv2p\\_w32\\_20e.py](https://github.com/open-mmlab/mmdetection/blob/master/configs/hrnet/cascade_mask_rcnn_hrnetv2p_w32_20e.py)

### Evaluation Table:-

| EPOCH | IOU             |                 |                 |                 |
|-------|-----------------|-----------------|-----------------|-----------------|
|       | 0.6             | 0.7             | 0.8             | 0.9             |
| 1     | 0.723514        | 0.702842        | 0.666667        | 0.449612        |
| 2     | 0.756661        | 0.742451        | 0.728242        | 0.641208        |
| 3     | 0.776199        | 0.760213        | 0.735346        | 0.657194        |
| 4     | 0.8             | 0.788679        | 0.779245        | 0.709434        |
| 5     | 0.875252        | 0.861167        | 0.841046        | 0.78672         |
| 6     | 0.847107        | 0.836777        | 0.820248        | 0.764463        |
| 7     | 0.895337        | 0.880829        | 0.866321        | 0.831088        |
| 8     | 0.899044        | 0.886291        | 0.87779         | 0.835282        |
| 9     | 0.841176        | 0.827451        | 0.813725        | 0.770588        |
| 10    | 0.92735         | 0.918803        | 0.90812         | 0.867521        |
| 11    | 0.930586        | 0.915401        | 0.906725        | 0.867679        |
| 12    | 0.903564        | 0.890985        | 0.878407        | 0.84696         |
| 13    | 0.922092        | 0.909285        | 0.909285        | 0.881537        |
| 14    | 0.905263        | 0.901053        | 0.882105        | 0.84            |
| 15    | 0.936957        | 0.926087        | 0.908696        | 0.880435        |
| 16    | 0.922747        | 0.916309        | 0.905579        | 0.862661        |
| 17    | 0.938865        | 0.932314        | 0.917031        | 0.886463        |
| 18    | 0.937841        | 0.929117        | 0.920393        | 0.887677        |
| 19    | 0.938865        | 0.930131        | 0.919214        | 0.886463        |
| 20    | 0.939891        | 0.931148        | 0.920219        | 0.885246        |
| 21    | <b>0.940919</b> | <b>0.932166</b> | <b>0.923414</b> | <b>0.886214</b> |
| 22    | 0.940919        | 0.932166        | 0.923414        | 0.886214        |
| 23    | 0.940919        | 0.932166        | 0.923414        | 0.886214        |

# ICDAR 19 Fine Tuned

Model Configuration:-

[https://github.com/open-mmlab/mmdetection/blob/master/configs/hrnet/cascade\\_mask\\_rcnn\\_hrnetv2p\\_w32\\_20e.py](https://github.com/open-mmlab/mmdetection/blob/master/configs/hrnet/cascade_mask_rcnn_hrnetv2p_w32_20e.py)

| Epoch | Cascade_mask_rcnn_hrnet |                 |                 |                 |
|-------|-------------------------|-----------------|-----------------|-----------------|
|       | 0.6                     | 0.7             | 0.8             | 0.9             |
| 1     | 0.940919                | 0.925602        | 0.916849        | 0.881838        |
| 2     | 0.938596                | 0.932018        | 0.923246        | 0.894737        |
| 3     | 0.943771                | 0.932745        | 0.92613         | 0.899669        |
| 4     | 0.936543                | 0.921225        | 0.910284        | 0.886214        |
| 5     | 0.940529                | 0.933921        | 0.92511         | 0.889868        |
| 6     | 0.937568                | 0.926616        | 0.917853        | 0.887185        |
| 7     | 0.940659                | 0.92967         | 0.923077        | 0.892308        |
| 8     | 0.938462                | 0.931868        | 0.923077        | 0.881319        |
| 9     | 0.938596                | 0.929825        | 0.916667        | 0.881579        |
| 10    | 0.937431                | 0.930845        | 0.922064        | 0.891328        |
| 11    | 0.939361                | 0.932745        | 0.923925        | 0.899669        |
| 12    | 0.940397                | 0.92936         | 0.922737        | 0.89404         |
| 13    | <b>0.942605</b>         | <b>0.931567</b> | <b>0.924945</b> | <b>0.900662</b> |
| 14    | 0.941566                | 0.93054         | 0.923925        | 0.893054        |
| 15    | 0.940659                | 0.927473        | 0.923077        | 0.887912        |
| 16    | 0.940659                | 0.92967         | 0.923077        | 0.894505        |



# TABLE BANK

without Annotation Correction and train dataset  
size 500

Dataset :- Word

| EPOCH | Word                |                    |                     |
|-------|---------------------|--------------------|---------------------|
|       | Precision           | Recall             | F1                  |
| 1     | 0.6906908101        | 0.7279081729       | 0.7088112872        |
| 2     | 0.7399527014        | 0.7401142336       | 0.7400334587        |
| 3     | 0.7506459456        | 0.7959008635       | 0.7726112818        |
| 4     | 0.7278200208        | 0.7586095162       | 0.7428958859        |
| 5     | 0.7517135815        | 0.7864689868       | 0.768698633         |
| 6     | 0.758192104         | 0.7935960874       | 0.7754902255        |
| 7     | 0.7863115216        | 0.8096700549       | 0.7978198523        |
| 8     | 0.7995694352        | 0.8191094179       | 0.8092214875        |
| 9     | 0.7320646491        | 0.7577066205       | 0.7446649598        |
| 10    | 0.7691164702        | 0.7938158906       | 0.7812710148        |
| 11    | <b>0.8028016151</b> | <b>0.827380258</b> | <b>0.8149056475</b> |
| 12    | 0.7835828758        | 0.8086614805       | 0.7959246782        |
| 13    | 0.7849088146        | 0.8124940672       | 0.7984632586        |
| 14    | 0.7925270256        | 0.8190752622       | 0.8055824768        |
| 15    | 0.7931177911        | 0.8168240051       | 0.8047963624        |
| 16    | 0.7915702685        | 0.8169328196       | 0.8040515882        |
| 17    | 0.7916470971        | 0.8173407971       | 0.8042887976        |

## Dataset :- Latex

| EPOCH | Latex               |                     |                    |
|-------|---------------------|---------------------|--------------------|
|       | Precision           | Recall              | F1                 |
| 1     | 0.9228870792        | 0.9492738634        | 0.9358945197       |
| 2     | 0.9266636538        | 0.9374905902        | 0.9320456807       |
| 3     | 0.9193349624        | 0.9433708627        | 0.9311978359       |
| 4     | 0.9172263581        | 0.9550716259        | 0.9357665037       |
| 5     | 0.9237093877        | 0.9464826676        | 0.9349573728       |
| 6     | 0.9221231843        | 0.9490151556        | 0.9353759245       |
| 7     | 0.9231681782        | 0.9498620223        | 0.936324884        |
| 8     | 0.9189220887        | 0.9506428531        | 0.934513369        |
| 9     | 0.9201000243        | 0.9524291395        | 0.9359855017       |
| 10    | <b>0.9305578405</b> | <b>0.9527632518</b> | <b>0.941529639</b> |
| 11    | 0.9142672362        | 0.9520920272        | 0.9327963414       |
| 12    | 0.9200840963        | 0.955957574         | 0.9376778507       |
| 13    | 0.9230835176        | 0.9520331336        | 0.9373348515       |
| 14    | 0.9220339628        | 0.9525904131        | 0.9370631523       |

## Dataset :- Both

| EPOCH | Both                |                     |                     |
|-------|---------------------|---------------------|---------------------|
|       | Precision           | Recall              | F1                  |
| 1     | 0.7648168564        | 0.7495721225        | 0.7571177582        |
| 2     | 0.8003890801        | 0.8322070608        | 0.8159880171        |
| 3     | 0.8194695269        | 0.8361888072        | 0.8277447492        |
| 4     | 0.8323342345        | 0.8726059985        | 0.8519944943        |
| 5     | 0.8156213844        | 0.8502366859        | 0.8325693949        |
| 6     | 0.8261896477        | 0.8499982769        | 0.837924873         |
| 7     | 0.7911923604        | 0.8284949308        | 0.809414093         |
| 8     | 0.8402422099        | 0.8626743464        | 0.8513105314        |
| 9     | 0.841536747         | 0.8688842972        | 0.8549918951        |
| 10    | 0.8414817273        | 0.8794623093        | 0.8600529098        |
| 11    | 0.8536566686        | 0.8780566237        | 0.8656847477        |
| 12    | <b>0.8510621144</b> | <b>0.8815610046</b> | <b>0.8660431277</b> |
| 13    | 0.8505321905        | 0.8803833177        | 0.8652003499        |

# TABLE BANK

with Annotation Correction and train dataset size 1500

Dataset :- Word

| EPOCH | Word                |                     |                   |
|-------|---------------------|---------------------|-------------------|
|       | Precision           | Recall              | F1                |
| 1     | 0.9663132339        | 0.9701914249        | 0.968248446       |
| 2     | 0.979575863         | 0.9845980611        | 0.9820805414      |
| 3     | 0.9854824096        | 0.9898770928        | 0.9876748627      |
| 4     | 0.9843642852        | 0.9944516226        | 0.989382243       |
| 5     | 0.986142864         | 0.9886099919        | 0.9873748868      |
| 6     | 0.9842226762        | 0.9906534684        | 0.987427602       |
| 7     | 0.9846453231        | 0.9945141101        | 0.989555112       |
| 8     | 0.9868242867        | 0.9903130233        | 0.988565577       |
| 9     | 0.9862395302        | 0.9909892989        | 0.9886087095      |
| 10    | <b>0.9880134322</b> | <b>0.9930677228</b> | <b>0.99053413</b> |
| 11    | 0.9861041274        | 0.9922218079        | 0.9891535086      |
| 12    | 0.9850163229        | 0.9914184234        | 0.9882070042      |
| 13    | 0.9801580823        | 0.9945153147        | 0.987284505       |
| 14    | 0.9874671496        | 0.9924378042        | 0.9899462373      |
| 15    | 0.9872649755        | 0.9932359384        | 0.9902414561      |
| 16    | 0.9852801549        | 0.9938701234        | 0.9895564979      |
| 17    | 0.9851871432        | 0.9939585539        | 0.9895534115      |
| 18    | 0.9857689236        | 0.9940340942        | 0.9898842564      |
| 19    | 0.9867220296        | 0.9938970597        | 0.9902965484      |
| 20    | 0.9862173301        | 0.9937903814        | 0.9899893732      |
| 21    | 0.9862339405        | 0.9940363467        | 0.9901197726      |

## Dataset :- Latex

| EPOCH | Latex               |                   |                     |
|-------|---------------------|-------------------|---------------------|
|       | Precision           | Recall            | F1                  |
| 1     | 0.8464658325        | 0.8852926763      | 0.8654439963        |
| 2     | 0.9218571268        | 0.9467914143      | 0.9341579154        |
| 3     | 0.9289714538        | 0.9270370133      | 0.9280032254        |
| 4     | 0.9089079786        | 0.9287697614      | 0.918731536         |
| 5     | 0.9457037387        | 0.9439637668      | 0.9448329517        |
| 6     | 0.9384518818        | 0.9456510854      | 0.9420377295        |
| 7     | 0.9461505847        | 0.9517564423      | 0.9489452345        |
| 8     | 0.9429540684        | 0.9534258001      | 0.948161022         |
| 9     | 0.9446579774        | 0.9630394992      | 0.9537601812        |
| 10    | 0.9018629357        | 0.9111222727      | 0.9064689594        |
| 11    | 0.947573742         | 0.9593630904      | 0.9534319733        |
| 12    | 0.9315259066        | 0.9485390059      | 0.9399554787        |
| 13    | 0.9384698852        | 0.9425383212      | 0.9404997034        |
| 14    | <b>0.9592066966</b> | <b>0.97280196</b> | <b>0.9659564943</b> |
| 15    | 0.9509428235        | 0.959083229       | 0.9549956793        |
| 16    | 0.9398396232        | 0.9514829693      | 0.9456254569        |
| 17    | 0.9423361839        | 0.9564856434      | 0.9493581948        |

## Dataset :- Both

| EPOCH | Both                |                     |                    |
|-------|---------------------|---------------------|--------------------|
|       | Precision           | Recall              | F1                 |
| 1     | 0.8853102504        | 0.9120978982        | 0.8985044597       |
| 2     | 0.8761654193        | 0.8827260655        | 0.8794335068       |
| 3     | 0.9541299304        | 0.9449597206        | 0.9495226852       |
| 4     | 0.9304259486        | 0.9182692602        | 0.9243076343       |
| 5     | 0.9307271016        | 0.9373854537        | 0.9340444118       |
| 6     | 0.9550765435        | 0.9648758474        | 0.959951188        |
| 7     | 0.9513886186        | 0.9546137883        | 0.9529984748       |
| 8     | 0.9527138997        | 0.9615421895        | 0.9571076871       |
| 9     | 0.9589037691        | 0.9741595846        | 0.9664714771       |
| 10    | 0.9570692938        | 0.9656109653        | 0.961321156        |
| 11    | <b>0.9570524116</b> | <b>0.9731934606</b> | <b>0.965055449</b> |
| 12    | 0.9555990994        | 0.9668770365        | 0.9612049877       |
| 13    | 0.9598927772        | 0.9682749661        | 0.964065652        |
| 14    | 0.9547643202        | 0.9620421454        | 0.9583894164       |
| 15    | 0.9574011207        | 0.971713968         | 0.9645044481       |
| 16    | 0.9570564339        | 0.9602325118        | 0.9586418422       |
| 17    | 0.9589442461        | 0.9675446361        | 0.9632252438       |
| 18    | 0.9600900279        | 0.9709406212        | 0.9654848394       |

**Baseline Model (Resnext101)**  
**ICDAR\_Test are Original Testing**  
**ICDAR\_Dilated are Dilated Testing set**  
**ICDAR\_Smudge are Smudge Testing set**

**Baseline Trained and Tested on ICDAR\_Test**

| <b>EPOCH</b> | <b>Trained and Tested on ORIGINAL</b> |                |                 |                 |
|--------------|---------------------------------------|----------------|-----------------|-----------------|
|              | <b>0.6</b>                            | <b>0.7</b>     | <b>0.8</b>      | <b>0.9</b>      |
| <b>1</b>     | 0.328619                              | 0.27787        | 0.157238        | 0.027454        |
| <b>2</b>     | 0.20246                               | 0.165044       | 0.105074        | 0.018452        |
| <b>3</b>     | 0.489423                              | 0.464265       | 0.40709         | 0.124643        |
| <b>4</b>     | 0.52844                               | 0.512538       | 0.43792         | 0.064832        |
| <b>5</b>     | 0.568449                              | 0.550196       | 0.509778        | 0.290743        |
| <b>6</b>     | 0.723297                              | 0.70984        | 0.66947         | 0.491169        |
| <b>7</b>     | 0.761989                              | 0.74778        | 0.690941        | 0.509769        |
| <b>8</b>     | 0.688189                              | 0.664567       | 0.604724        | 0.251969        |
| <b>9</b>     | 0.811268                              | 0.794366       | 0.762441        | 0.597183        |
| <b>10</b>    | 0.816714                              | 0.801519       | 0.767331        | 0.605888        |
| <b>11</b>    | 0.840353                              | 0.818805       | 0.787463        | 0.607248        |
| <b>12</b>    | 0.831395                              | 0.817829       | 0.782946        | 0.625969        |
| <b>13</b>    | 0.832527                              | 0.815102       | 0.78606         | 0.635044        |
| <b>14</b>    | 0.835763                              | 0.816327       | 0.787172        | 0.633625        |
| <b>15</b>    | 0.831721                              | 0.812379       | 0.779497        | 0.618956        |
| <b>16</b>    | 0.831721                              | 0.812379       | 0.783366        | 0.628627        |
| <b>17</b>    | <b>0.835763</b>                       | <b>0.81827</b> | <b>0.787172</b> | <b>0.621963</b> |

## Baseline Trained on Dilated And Tested On ICDAR\_Dilated and ICDAR\_Test

| EPOCH | Trained on dilate+original and Tested on dilate +Original |                   |                |                   |                |                   |                |                   |
|-------|-----------------------------------------------------------|-------------------|----------------|-------------------|----------------|-------------------|----------------|-------------------|
|       | 0.6                                                       |                   | 0.7            |                   | 0.8            |                   | 0.9            |                   |
|       | ICDAR_<br>Test                                            | ICDAR_<br>Dilated | ICDAR_<br>Test | ICDAR_<br>Dilated | ICDAR_<br>Test | ICDAR_<br>Dilated | ICDAR_<br>Test | ICDAR_<br>Dilated |
| 1     | 0.441572                                                  | -                 | 0.412616       | -                 | 0.315408       | -                 | 0.087901       | -                 |
| 2     | 0.458558                                                  | -                 | 0.441335       | -                 | 0.399354       | -                 | 0.184069       | -                 |
| 3     | 0.522489                                                  | -                 | 0.504005       | -                 | 0.45841        | -                 | 0.264941       | -                 |
| 4     | 0.655564                                                  | -                 | 0.632854       | -                 | 0.604088       | -                 | 0.417865       | -                 |
| 5     | 0.730213                                                  | -                 | 0.713191       | -                 | 0.675745       | -                 | 0.514043       | -                 |
| 6     | 0.761313                                                  | -                 | 0.741792       | -                 | 0.700976       | -                 | 0.505768       | -                 |
| 7     | 0.791859                                                  | -                 | 0.780759       | -                 | 0.754857       | -                 | 0.599445       | -                 |
| 8     | 0.819231                                                  | -                 | 0.8            | -                 | 0.759615       | -                 | 0.426923       | -                 |
| 9     | 0.855721                                                  | -                 | 0.843781       | -                 | 0.8199         | -                 | 0.680597       | -                 |
| 10    | 0.853175                                                  | 0.84705<br>9      | 0.837302       | 0.831373          | 0.821429       | 0.8               | 0.706349       | 0.662745          |
| 11    | 0.867543                                                  | 0.86002           | 0.853387       | 0.843907          | 0.833165       | 0.817724          | 0.695652       | 0.674723          |
| 12    | 0.868421                                                  | 0.86086<br>1      | 0.854251       | 0.840841          | 0.836032       | 0.808809          | 0.698381       | 0.680681          |
| 13    | 0.866667                                                  | 0.85828<br>3      | 0.852525       | 0.840319          | 0.832323       | 0.810379          | 0.694949       | 0.678643          |
| 14    | 0.869565                                                  | 0.86113<br>9      | 0.851365       | 0.843157          | 0.833165       | 0.813187          | 0.697674       | 0.681319          |
| 15    | 0.873984                                                  | 0.85914<br>1      | 0.857724       | 0.843157          | 0.839431       | 0.809191          | 0.703252       | 0.677323          |
| 16    | 0.869036                                                  | 0.85657<br>4      | 0.854822       | 0.840637          | 0.838579       | 0.808765          | 0.702538       | 0.693227          |



## Baseline Trained On SMUDGED Dataset Tested On ICDAR\_Test and ICDAR\_ SMUDGE

| EPOCH | Trained on Smudge+original and Tested on Smudge + Original |                      |                |                      |                |                      |                |                      |
|-------|------------------------------------------------------------|----------------------|----------------|----------------------|----------------|----------------------|----------------|----------------------|
|       | 0.6                                                        |                      | 0.7            |                      | 0.8            |                      | 0.9            |                      |
|       | ICDAR_<br>Test                                             | ICDAR_<br>SMUDG<br>E | ICDAR_<br>Test | ICDAR_<br>SMUDG<br>E | ICDAR_<br>Test | ICDAR_<br>SMUDG<br>E | ICDAR_<br>Test | ICDAR_<br>SMUDG<br>E |
| 1     | 0.410501                                                   | -                    | 0.381862       | -                    | 0.292124       | -                    | 0.071599       | -                    |
| 2     | 0.479247                                                   | -                    | 0.456004       | -                    | 0.405091       | -                    | 0.185944       | -                    |
| 3     | 0.529519                                                   | -                    | 0.514912       | -                    | 0.457699       | -                    | 0.265368       | -                    |
| 4     | 0.650038                                                   | -                    | 0.618292       | -                    | 0.551776       | -                    | 0.226757       | -                    |
| 5     | 0.691438                                                   | -                    | 0.673667       | -                    | 0.638126       | -                    | 0.423263       | -                    |
| 6     | 0.667704                                                   | -                    | 0.655253       | -                    | 0.628794       | -                    | 0.362646       | -                    |
| 7     | 0.708197                                                   | -                    | 0.696721       | -                    | 0.670492       | -                    | 0.467213       | -                    |
| 8     | 0.790698                                                   | -                    | 0.772093       | -                    | 0.723721       | -                    | 0.55814        | -                    |
| 9     | 0.846686                                                   | -                    | 0.840752       | -                    | 0.820969       | -                    | 0.658754       | -                    |
| 10    | 0.852036                                                   | -                    | 0.840119       | -                    | 0.818272       | -                    | 0.649454       | -                    |
| 11    | 0.847761                                                   | 0.849452             | 0.839801       | 0.829511             | 0.823881       | 0.801595             | 0.662687       | 0.656032             |
| 12    | 0.854291                                                   | 0.844091             | 0.844311       | 0.826216             | 0.828343       | 0.804369             | 0.674651       | 0.647468             |
| 13    | 0.857715                                                   | 0.847525             | 0.847695       | 0.825743             | 0.831663       | 0.805941             | 0.673347       | 0.653465             |
| 14    | 0.85657                                                    | 0.845771             | 0.84654        | 0.827861             | 0.830491       | 0.80597              | 0.674022       | 0.652736             |
| 15    | 0.858576                                                   | 0.848907             | 0.848546       | 0.827038             | 0.832497       | 0.809145             | 0.678034       | 0.652087             |
| 16    | 0.859438                                                   | 0.846077             | 0.849398       | 0.82423              | 0.833333       | 0.806356             | 0.690763       | 0.647468             |
| 17    | <b>0.86318</b>                                             | <b>0.84158</b>       | <b>0.85311</b> | <b>0.82178</b>       | <b>0.83903</b> | <b>0.80396</b>       | <b>0.68410</b> | <b>0.65346</b>       |

## Baseline Trained on All And Tested on ICDAR\_Test

| Epoch | Trained On ALL and Test On Original |                 |                 |                 |
|-------|-------------------------------------|-----------------|-----------------|-----------------|
|       | 0.6                                 | 0.7             | 0.8             | 0.9             |
| 1     |                                     |                 |                 |                 |
| 2     | 0.471302                            | 0.439294        | 0.290287        | 0.020971        |
| 3     | 0.755989                            | 0.734694        | 0.670807        | 0.362023        |
| 4     | 0.617037                            | 0.604152        | 0.555476        | 0.287759        |
| 5     | 0.736301                            | 0.729452        | 0.683219        | 0.489726        |
| 6     | 0.800371                            | 0.789229        | 0.761374        | 0.499536        |
| 7     | 0.773381                            | 0.764388        | 0.739209        | 0.580935        |
| 8     | 0.782214                            | 0.76225         | 0.724138        | 0.577132        |
| 9     | 0.864919                            | 0.84879         | 0.824597        | 0.566532        |
| 10    | 0.879753                            | 0.869476        | 0.850976        | 0.723535        |
| 1     | <b>0.887734</b>                     | <b>0.883576</b> | <b>0.862786</b> | <b>0.735967</b> |

## Baseline Trained On All Dataset And Tested On ICDAR\_ Dilated

| EPOCH | Trained On ALL TESTED ON DILATED |                |                 |                |
|-------|----------------------------------|----------------|-----------------|----------------|
|       | 0.6                              | 0.7            | 0.8             | 0.9            |
| 1     | 0.483191                         | 0.438746       | 0.274644        | 0.020513       |
| 2     | 0.745645                         | 0.721254       | 0.651568        | 0.367596       |
| 3     | 0.608511                         | 0.598582       | 0.55461         | 0.307801       |
| 4     | 0.726655                         | 0.704584       | 0.677419        | 0.47708        |
| 5     | 0.795937                         | 0.781163       | 0.755309        | 0.526316       |
| 6     | 0.781818                         | 0.769091       | 0.734545        | 0.543636       |
| 7     | 0.783809                         | 0.765409       | 0.724931        | 0.572217       |
| 8     | 0.838454                         | 0.824579       | 0.794846        | 0.539148       |
| 9     | 0.876684                         | 0.860104       | 0.841451        | 0.702591       |
| 10    | <b>0.88377</b>                   | <b>0.86911</b> | <b>0.846073</b> | <b>0.72251</b> |

## Table Structure Recognition Results ( ICDAR'19 )

| Team Name  | IoU@0.6   |        |        | IoU@0.7   |        |        | IoU@0.8   |        |        | IoU@0.9   |          |          | WAvg. F1 |
|------------|-----------|--------|--------|-----------|--------|--------|-----------|--------|--------|-----------|----------|----------|----------|
|            | Precision | Recall | F1     | Precision | Recall | F1     | Precision | Recall | F1     | Precision | Recall   | F1       |          |
| Ours       | 0.4988    | 0.39   | 0.4377 | 0.403     | 0.3151 | 0.3537 | 0.2164    | 0.1692 | 0.1899 | 0.041     | 0.03208  | 0.036    | 0.2315   |
| NLPR-PAL   | 0.3224    | 0.4206 | 0.365  | 0.269     | 0.3509 | 0.3046 | 0.1722    | 0.2246 | 0.195  | 0.0305    | 0.0397   | 0.0345   | 0.2064   |
| HCL IDORAN | 0.4206    | 0.001  | 0.0013 | 0.0012    | 0.0007 | 0.0009 | 0.0003    | 0.0002 | 0.0002 | 0.0001    | 8.00E-05 | 9.00E-05 | 3.00E-04 |

# Models and their Performance Graph for each IoU value

## 1) IoU 0.6

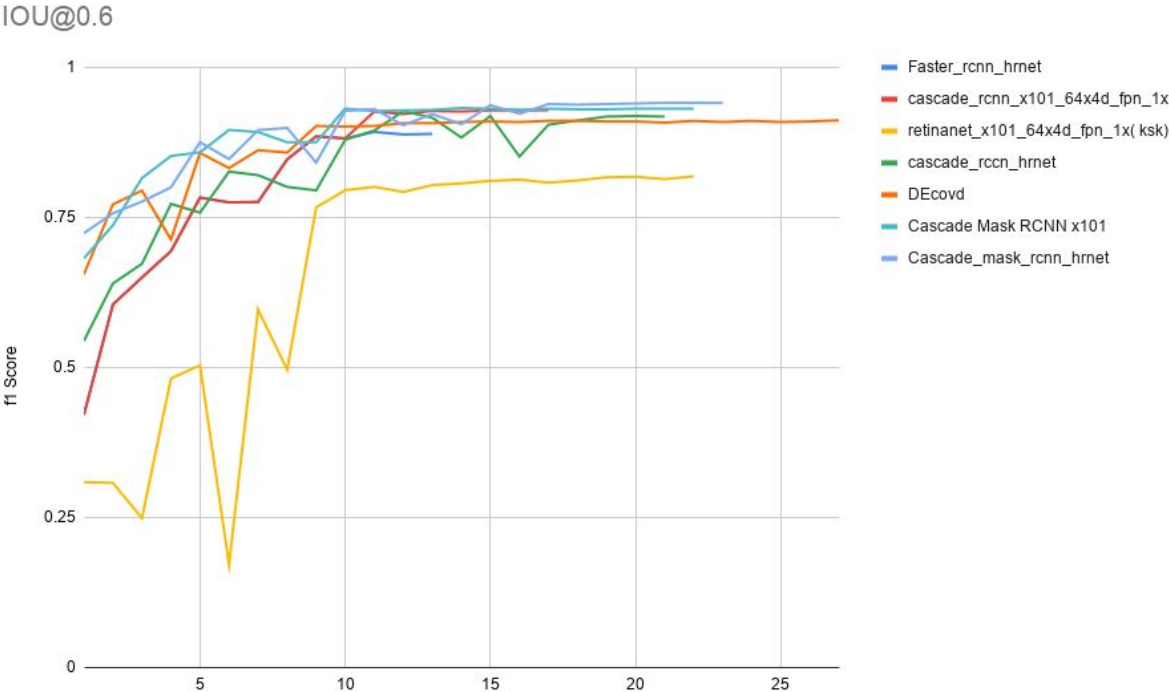

## 2) IoU 0.7

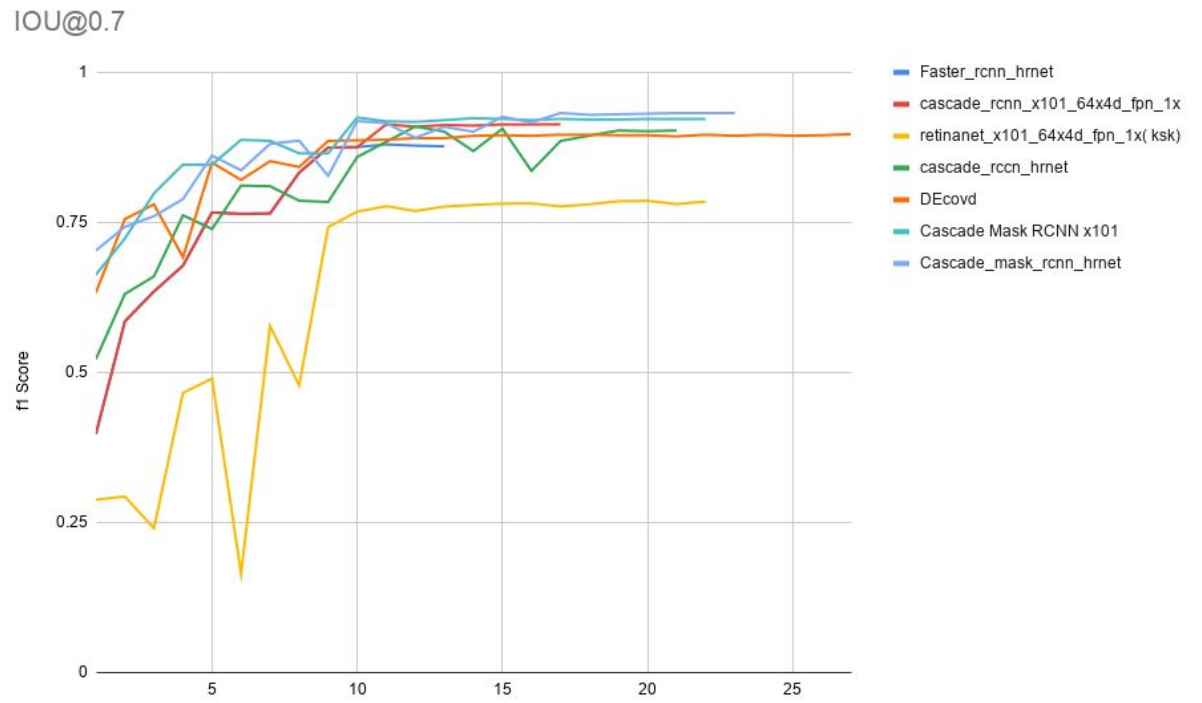

### 3) IoU 0.8

IOU@0.8

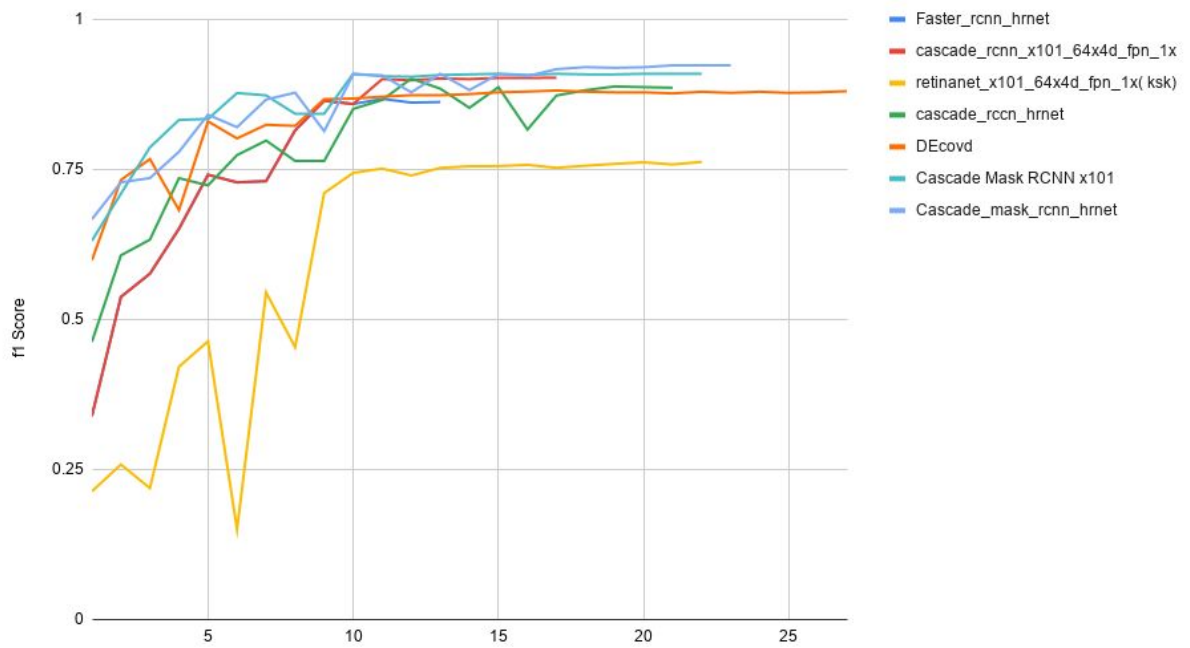

## 4) IoU 0.9

IOU@0.9

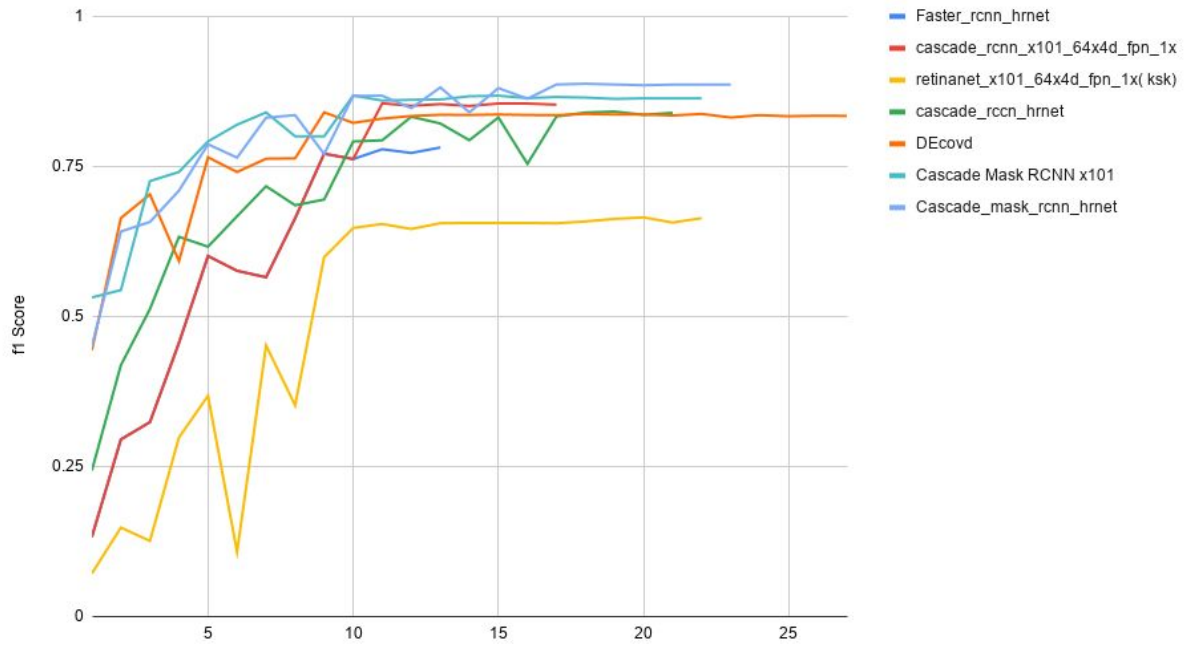



# Dataset link, Preparation And results

## Links

1. Marmot      Dataset

<http://www.icst.pku.edu.cn/cpdp/sjzy/index.htm>

2. ICDAR'19      Dataset and Evaluation Tool

[https://github.com/cndplab-founder/ICDAR2019\\_cTDaR](https://github.com/cndplab-founder/ICDAR2019_cTDaR)

[https://github.com/cndplab-founder/ctdar\\_measurement\\_tool](https://github.com/cndplab-founder/ctdar_measurement_tool)

3. Github      Dataset

<https://github.com/sgrpanchal31/table-detection-dataset>

4. Tablebank      Dataset

<https://github.com/doc-analysis/TableBank>

# Preparation:

## Original

Pillar 3 Disclosures at 31 December 2018

Table 21: Geographical breakdown of exposures (CRB-C)

|                                                           | Net carrying values <sup>1/2</sup> |       |        |       |         |       |       |      |       |      |       |     |
|-----------------------------------------------------------|------------------------------------|-------|--------|-------|---------|-------|-------|------|-------|------|-------|-----|
|                                                           | Africa                             |       | Europe |       | Other   |       | Asia  |      | Other |      | Total |     |
|                                                           | Amn                                | Stn   | Amn    | Stn   | Amn     | Stn   | Amn   | Stn  | Amn   | Stn  | Amn   | Stn |
| <b>IRB approach exposures classes</b>                     |                                    |       |        |       |         |       |       |      |       |      |       |     |
| 1. Central governments and central banks                  | 4.3                                | 0.4   | 0.7    | 2.0   | 172.4   | 82.9  | 29.7  | 15.4 | 74.9  | 24.9 |       |     |
| 2. Institutions                                           | 293.1                              | 80.7  | 7.8    | 16.8  | 484.8   | 7.9   | 13.8  | 7.8  | 112.2 |      |       |     |
| 3. Corporates                                             | 307.9                              | 171.7 | 47.2   | 89.0  | 448.9   | 207.8 | 79.8  | 27.2 | 121.0 |      |       |     |
| 4. Retail                                                 | 208.1                              | 201.0 | 29.1   | 2.0   | 108.9   | 104.4 | 8.4   | 6.8  | 26.2  |      |       |     |
| 5. Total IRB approach                                     | 863.4                              | 381.8 | 74.2   | 107.4 | 854.3   | 428.8 | 128.8 | 57.8 | 238.9 |      |       |     |
| <b>Standardised approach exposures classes</b>            |                                    |       |        |       |         |       |       |      |       |      |       |     |
| 7. Central governments and central banks <sup>3</sup>     | 158.6                              | 82.7  | 49.2   | 20.9  | 0.9     | 0.9   | —     | —    | 0.3   |      |       |     |
| 8. Regional governments or local authorities <sup>4</sup> | 2.7                                | —     | —      | 2.7   | —       | —     | —     | —    | —     |      |       |     |
| 9. Public sector entities <sup>5</sup>                    | 12.1                               | —     | —      | 0.2   | 73.9    | —     | —     | —    | —     |      |       |     |
| 10. Multilateral development banks                        | —                                  | —     | —      | —     | —       | —     | —     | —    | —     |      |       |     |
| 11. International organisations                           | —                                  | —     | —      | —     | —       | —     | —     | —    | —     |      |       |     |
| 12. Institutions                                          | 1.0                                | —     | —      | 0.1   | 0.2     | 0.7   | —     | —    | 0.7   |      |       |     |
| 13. Corporates                                            | 273.0                              | 2.9   | 4.2    | 26.7  | 86.1    | 48.8  | 8.8   | 7.8  | 78.7  |      |       |     |
| 14. Retail                                                | 9.0                                | 7.2   | 0.4    | 1.4   | 48.2    | 10.8  | 2.8   | 6.8  | 78.7  |      |       |     |
| 15. Secured by mortgages on immovable property            | 8.6                                | 1.8   | —      | —     | 19.8    | 8.2   | 7.8   | 0.4  | —     |      |       |     |
| 16. Exposures in default                                  | 0.8                                | 0.1   | —      | —     | 0.4     | 0.7   | —     | —    | 0.3   |      |       |     |
| 17. Items associated with purchase high risk              | 2.8                                | 0.8   | —      | —     | —       | —     | —     | —    | —     |      |       |     |
| 20. Collective investment undertakings (CIU)              | 0.8                                | 0.8   | —      | —     | —       | —     | —     | —    | —     |      |       |     |
| 21. Equity exposures                                      | 1.8                                | 2.9   | 0.2    | —     | 1.9     | 1.8   | 0.7   | 0.7  | —     |      |       |     |
| 22. Other exposures                                       | 3.8                                | 2.9   | 0.8    | —     | 4.2     | 4.2   | 0.9   | —    | —     |      |       |     |
| 23. Total standardised approach                           | 378.8                              | 88.4  | 54.6   | 29.2  | 188.4   | 68.4  | 20.2  | 14.8 | 26.0  |      |       |     |
| 24. Total at 31 Dec 2018                                  | 782.0                              | 470.2 | 127.8  | 137.8 | 1,042.7 | 497.2 | 149.0 | 72.6 | 274.9 |      |       |     |

Table 21: Geographical breakdown of exposures (CRB-C) (continued)

|                                                           | Net carrying values <sup>1/2</sup> |       |        |       |       |       |      |      |         |         |       |     |
|-----------------------------------------------------------|------------------------------------|-------|--------|-------|-------|-------|------|------|---------|---------|-------|-----|
|                                                           | Africa                             |       | Europe |       | Other |       | Asia |      | Other   |         | Total |     |
|                                                           | Amn                                | Stn   | Amn    | Stn   | Amn   | Stn   | Amn  | Stn  | Amn     | Stn     | Amn   | Stn |
| <b>IRB approach exposures classes</b>                     |                                    |       |        |       |       |       |      |      |         |         |       |     |
| 1. Central governments and central banks                  | 15.1                               | 111.0 | 89.0   | 20.7  | —     | —     | 18.8 | 13.2 | 291.7   |         |       |     |
| 2. Institutions                                           | 8.2                                | 232.2 | 14.8   | 0.9   | 0.2   | 0.2   | —    | —    | 0.1     | 1,021.7 |       |     |
| 3. Corporates                                             | 3.4                                | 22.6  | 27.9   | 22.3  | 2.8   | 0.2   | —    | —    | 403.3   |         |       |     |
| 4. Retail                                                 | 1.8                                | 201.9 | 292.7  | 292.6 | 74.4  | 23.7  | —    | —    | 1,522.0 |         |       |     |
| 5. Total IRB approach                                     | 27.3                               | 558.6 | 334.4  | 443.2 | 86.2  | 26.1  | —    | —    | 2,028.8 |         |       |     |
| <b>Standardised approach exposures classes</b>            |                                    |       |        |       |       |       |      |      |         |         |       |     |
| 7. Central governments and central banks <sup>3</sup>     | 4.7                                | —     | —      | —     | —     | —     | —    | —    | 168.9   |         |       |     |
| 8. Regional governments or local authorities <sup>4</sup> | 3.7                                | —     | —      | —     | —     | —     | —    | —    | 7.3     |         |       |     |
| 9. Public sector entities <sup>5</sup>                    | —                                  | —     | —      | —     | —     | —     | —    | —    | 1.8     | 1.8     |       |     |
| 10. Multilateral development banks                        | —                                  | —     | —      | —     | —     | —     | —    | —    | 0.2     | 0.2     |       |     |
| 11. International organisations                           | —                                  | —     | —      | —     | —     | —     | —    | —    | 1.8     | 1.8     |       |     |
| 12. Institutions                                          | 3.1                                | —     | —      | —     | —     | —     | —    | —    | 0.4     | 0.4     |       |     |
| 13. Corporates                                            | 48.1                               | 13.3  | 4.4    | 6.9   | 2.7   | 8.1   | —    | —    | 178.4   |         |       |     |
| 14. Retail                                                | 8.7                                | 2.9   | 0.7    | 1.7   | 0.8   | 0.9   | —    | —    | 63.8    |         |       |     |
| 15. Secured by mortgages on immovable property            | 3.4                                | 1.1   | —      | —     | 1.4   | 2.8   | —    | —    | 178.4   |         |       |     |
| 16. Exposures in default                                  | 1.1                                | 0.4   | —      | —     | 0.9   | 0.9   | —    | —    | 1.0     |         |       |     |
| 17. Items associated with purchase high risk              | 0.8                                | 1.8   | —      | —     | 0.9   | 0.9   | —    | —    | 4.8     |         |       |     |
| 20. Collective investment undertakings (CIU)              | 0.2                                | 1.2   | —      | —     | 0.7   | 0.2   | —    | —    | 18.0    |         |       |     |
| 21. Equity exposures                                      | —                                  | —     | —      | —     | —     | —     | —    | —    | 11.0    |         |       |     |
| 22. Other exposures                                       | 0.8                                | 0.8   | —      | —     | —     | —     | —    | —    | 11.0    |         |       |     |
| 23. Total standardised approach                           | 60.3                               | 22.9  | 74.4   | 27.4  | 8.4   | 40.1  | —    | —    | 400.1   |         |       |     |
| 24. Total at 31 Dec 2018                                  | 127.9                              | 420.8 | 298.7  | 380.5 | 12.2  | 102.8 | —    | —    | 2,428.9 |         |       |     |

## Dilation

Pillar 3 Disclosures at 31 December 2018

Table 21: Geographical breakdown of exposures (CRB-C)

|                                                           | Net carrying values <sup>1/2</sup> |       |        |       |         |       |       |      |       |      |       |     |
|-----------------------------------------------------------|------------------------------------|-------|--------|-------|---------|-------|-------|------|-------|------|-------|-----|
|                                                           | Africa                             |       | Europe |       | Other   |       | Asia  |      | Other |      | Total |     |
|                                                           | Amn                                | Stn   | Amn    | Stn   | Amn     | Stn   | Amn   | Stn  | Amn   | Stn  | Amn   | Stn |
| <b>IRB approach exposures classes</b>                     |                                    |       |        |       |         |       |       |      |       |      |       |     |
| 1. Central governments and central banks                  | 4.3                                | 0.4   | 0.7    | 2.0   | 172.4   | 82.9  | 29.7  | 15.4 | 74.9  | 24.9 |       |     |
| 2. Institutions                                           | 293.1                              | 80.7  | 7.8    | 16.8  | 484.8   | 7.9   | 13.8  | 7.8  | 112.2 |      |       |     |
| 3. Corporates                                             | 307.9                              | 171.7 | 47.2   | 89.0  | 448.9   | 207.8 | 79.8  | 27.2 | 121.0 |      |       |     |
| 4. Retail                                                 | 208.1                              | 201.0 | 29.1   | 2.0   | 108.9   | 104.4 | 8.4   | 6.8  | 26.2  |      |       |     |
| 5. Total IRB approach                                     | 863.4                              | 381.8 | 74.2   | 107.4 | 854.3   | 428.8 | 128.8 | 57.8 | 238.9 |      |       |     |
| <b>Standardised approach exposures classes</b>            |                                    |       |        |       |         |       |       |      |       |      |       |     |
| 7. Central governments and central banks <sup>3</sup>     | 158.6                              | 82.7  | 49.2   | 20.9  | 0.9     | 0.9   | —     | —    | 0.3   |      |       |     |
| 8. Regional governments or local authorities <sup>4</sup> | 2.7                                | —     | —      | 2.7   | —       | —     | —     | —    | —     |      |       |     |
| 9. Public sector entities <sup>5</sup>                    | 12.1                               | —     | —      | 0.2   | 73.9    | —     | —     | —    | —     |      |       |     |
| 10. Multilateral development banks                        | —                                  | —     | —      | —     | —       | —     | —     | —    | —     |      |       |     |
| 11. International organisations                           | —                                  | —     | —      | —     | —       | —     | —     | —    | —     |      |       |     |
| 12. Institutions                                          | 1.0                                | —     | —      | 0.1   | 0.2     | 0.7   | —     | —    | 0.7   |      |       |     |
| 13. Corporates                                            | 273.0                              | 2.9   | 4.2    | 26.7  | 86.1    | 48.8  | 8.8   | 7.8  | 78.7  |      |       |     |
| 14. Retail                                                | 9.0                                | 7.2   | 0.4    | 1.4   | 48.2    | 10.8  | 2.8   | 6.8  | 78.7  |      |       |     |
| 15. Secured by mortgages on immovable property            | 8.6                                | 1.8   | —      | —     | 19.8    | 8.2   | 7.8   | 0.4  | —     |      |       |     |
| 16. Exposures in default                                  | 0.8                                | 0.1   | —      | —     | 0.4     | 0.7   | —     | —    | 0.3   |      |       |     |
| 17. Items associated with purchase high risk              | 2.8                                | 0.8   | —      | —     | —       | —     | —     | —    | —     |      |       |     |
| 20. Collective investment undertakings (CIU)              | 0.8                                | 0.8   | —      | —     | —       | —     | —     | —    | —     |      |       |     |
| 21. Equity exposures                                      | 1.8                                | 2.9   | 0.2    | —     | 1.9     | 1.8   | 0.7   | 0.7  | —     |      |       |     |
| 22. Other exposures                                       | 3.8                                | 2.9   | 0.8    | —     | 4.2     | 4.2   | 0.9   | —    | —     |      |       |     |
| 23. Total standardised approach                           | 378.8                              | 88.4  | 54.6   | 29.2  | 188.4   | 68.4  | 20.2  | 14.8 | 26.0  |      |       |     |
| 24. Total at 31 Dec 2018                                  | 782.0                              | 470.2 | 127.8  | 137.8 | 1,042.7 | 497.2 | 149.0 | 72.6 | 274.9 |      |       |     |

Table 21: Geographical breakdown of exposures (CRB-C) (continued)

|                                                           | Net carrying values <sup>1/2</sup> |       |        |       |       |       |      |      |         |         |       |     |
|-----------------------------------------------------------|------------------------------------|-------|--------|-------|-------|-------|------|------|---------|---------|-------|-----|
|                                                           | Africa                             |       | Europe |       | Other |       | Asia |      | Other   |         | Total |     |
|                                                           | Amn                                | Stn   | Amn    | Stn   | Amn   | Stn   | Amn  | Stn  | Amn     | Stn     | Amn   | Stn |
| <b>IRB approach exposures classes</b>                     |                                    |       |        |       |       |       |      |      |         |         |       |     |
| 1. Central governments and central banks                  | 15.1                               | 111.0 | 89.0   | 20.7  | —     | —     | 18.8 | 13.2 | 291.7   |         |       |     |
| 2. Institutions                                           | 8.2                                | 232.2 | 14.8   | 0.9   | 0.2   | 0.2   | —    | —    | 0.1     | 1,021.7 |       |     |
| 3. Corporates                                             | 3.4                                | 22.6  | 27.9   | 22.3  | 2.8   | 0.2   | —    | —    | 403.3   |         |       |     |
| 4. Retail                                                 | 1.8                                | 201.9 | 292.7  | 292.6 | 74.4  | 23.7  | —    | —    | 1,522.0 |         |       |     |
| 5. Total IRB approach                                     | 27.3                               | 558.6 | 334.4  | 443.2 | 86.2  | 26.1  | —    | —    | 2,028.8 |         |       |     |
| <b>Standardised approach exposures classes</b>            |                                    |       |        |       |       |       |      |      |         |         |       |     |
| 7. Central governments and central banks <sup>3</sup>     | 4.7                                | —     | —      | —     | —     | —     | —    | —    | 168.9   |         |       |     |
| 8. Regional governments or local authorities <sup>4</sup> | 3.7                                | —     | —      | —     | —     | —     | —    | —    | 7.3     |         |       |     |
| 9. Public sector entities <sup>5</sup>                    | —                                  | —     | —      | —     | —     | —     | —    | —    | 1.8     | 1.8     |       |     |
| 10. Multilateral development banks                        | —                                  | —     | —      | —     | —     | —     | —    | —    | 0.2     | 0.2     |       |     |
| 11. International organisations                           | —                                  | —     | —      | —     | —     | —     | —    | —    | 1.8     | 1.8     |       |     |
| 12. Institutions                                          | 3.1                                | —     | —      | —     | —     | —     | —    | —    | 0.4     | 0.4     |       |     |
| 13. Corporates                                            | 48.1                               | 13.3  | 4.4    | 6.9   | 2.7   | 8.1   | —    | —    | 178.4   |         |       |     |
| 14. Retail                                                | 8.7                                | 2.9   | 0.7    | 1.7   | 0.8   | 0.9   | —    | —    | 63.8    |         |       |     |
| 15. Secured by mortgages on immovable property            | 3.4                                | 1.1   | —      | —     | 1.4   | 2.8   | —    | —    | 178.4   |         |       |     |
| 16. Exposures in default                                  | 1.1                                | 0.4   | —      | —     | 0.9   | 0.9   | —    | —    | 1.0     |         |       |     |
| 17. Items associated with purchase high risk              | 0.8                                | 1.8   | —      | —     | 0.9   | 0.9   | —    | —    | 4.8     |         |       |     |
| 20. Collective investment undertakings (CIU)              | 0.2                                | 1.2   | —      | —     | 0.7   | 0.2   | —    | —    | 18.0    |         |       |     |
| 21. Equity exposures                                      | —                                  | —     | —      | —     | —     | —     | —    | —    | 11.0    |         |       |     |
| 22. Other exposures                                       | 0.8                                | 0.8   | —      | —     | —     | —     | —    | —    | 11.0    |         |       |     |
| 23. Total standardised approach                           | 60.3                               | 22.9  | 74.4   | 27.4  | 8.4   | 40.1  | —    | —    | 400.1   |         |       |     |
| 24. Total at 31 Dec 2018                                  | 127.9                              | 420.8 | 298.7  | 380.5 | 12.2  | 102.8 | —    | —    | 2,428.9 |         |       |     |

## Smudge

Pillar 3 Disclosures at 31 December 2018

Table 21: Geographical breakdown of exposures (CRB-C)

|                                          | Net carrying values <sup>1/2</sup> |       |        |       |       |       |      |      |       |      |       |     |
|------------------------------------------|------------------------------------|-------|--------|-------|-------|-------|------|------|-------|------|-------|-----|
|                                          | Africa                             |       | Europe |       | Other |       | Asia |      | Other |      | Total |     |
|                                          | Amn                                | Stn   | Amn    | Stn   | Amn   | Stn   | Amn  | Stn  | Amn   | Stn  | Amn   | Stn |
| <b>IRB approach exposures classes</b>    |                                    |       |        |       |       |       |      |      |       |      |       |     |
| 1. Central governments and central banks | 4.3                                | 0.4   | 0.7    | 2.0   | 172.4 | 82.9  | 29.7 | 15.4 | 74.9  | 24.9 |       |     |
| 2. Institutions                          | 293.1                              | 80.7  | 7.8    | 16.8  | 484.8 | 7.9   | 13.8 | 7.8  | 112.2 |      |       |     |
| 3. Corporates                            | 307.9                              | 171.7 | 47.2   | 89.0  | 448.9 | 207.8 | 79.8 | 27.2 | 121.0 |      |       |     |
| 4. Retail                                | 208.1                              | 201.0 | 29.1   | 2.0   | 108.9 | 104.4 | 8.4  | 6.8  | 26.2  |      |       |     |
| 5. Total IRB approach                    | 863.4                              | 381.8 | 74.2   | 107.4 |       |       |      |      |       |      |       |     |

## 2.1 Results

**Location-Aware User Modelling System.** Logbook data shows the most common location of Pocket PC use to be at home, followed by various rooms in EECE. Some students also used their Pocket PC in other parts of the campus and elsewhere. Results of 3 typical users are presented in Table 1, as an example of similarities and differences between Pocket PC use. 10 of the generally common activities are listed: reading, email, web browsing, notes, calendar, computer assisted learning, word processing, calculator, music, games. Each user also performed a few additional tasks in other categories, not shown (e.g. MSN Messenger, Excel, viewing lecture slides).

Table 1: Activities and location of use of Pocket PC by 3 students

| Location     | read | mail | web | note | cal | CAL | WP | calc | mus | game |
|--------------|------|------|-----|------|-----|-----|----|------|-----|------|
| S1 home      | 1    | 2    |     | 5    | 4   | 2   | 2  | 1    | 7   | 1    |
| EECE G16     | 1    | 2    | 1   | 4    | 1   |     |    | 1    |     |      |
| EECE 337     | 1    | 1    | 1   | 1    |     |     |    | 1    | 2   |      |
| EECE 421     | 1    | 1    |     |      |     |     |    |      | 1   |      |
| EECE 435     |      |      | 2   |      |     |     |    | 2    |     |      |
| EECE CR      | 1    | 3    | 3   |      |     |     |    |      |     |      |
| EECE lib     | 3    | 1    | 1   | 1    |     |     |    | 1    |     |      |
| main hb      |      |      | 3   | 1    | 1   |     |    |      |     |      |
| shop         |      |      | 4   |      |     | 1   |    |      |     |      |
| S2 home      | 1    | 4    | 3   | 1    | 4   | 2   | 2  | 7    | 3   |      |
| other home   | 1    | 1    |     | 1    |     | 1   |    | 1    |     |      |
| EECE 123     | 1    | 1    |     |      |     |     |    |      |     |      |
| EECE 337     | 5    |      |     |      |     |     |    | 1    |     |      |
| EECE 522     |      |      | 1   | 1    |     |     |    |      |     |      |
| EECE CR      | 1    |      |     |      |     |     |    |      |     |      |
| EECE lib     |      |      |     |      |     |     | 1  |      |     |      |
| EECE res     | 1    | 2    |     |      |     |     |    |      |     |      |
| campus       | 1    |      |     | 1    |     |     |    | 1    |     |      |
| restaurant   | 1    |      |     | 1    |     |     |    | 1    |     |      |
| train        | 3    |      |     |      |     |     |    | 1    | 1   |      |
| S3 home      | 1    | 1    |     | 20   | 4   | 2   |    | 4    | 8   |      |
| EECE 225     | 1    | 2    |     |      |     |     |    |      |     |      |
| EECE 337     | 2    |      |     |      |     |     |    |      |     |      |
| EECE 421     | 1    | 1    | 1   | 9    |     |     |    | 1    | 1   |      |
| learn centre |      |      | 1   | 1    |     |     |    |      |     |      |

## 2.1 Results

**Location-Aware User Modelling System.** Logbook data shows the most common location of Pocket PC use to be at home, followed by various rooms in EECE. Some students also used their Pocket PC in other parts of the campus and elsewhere. Results of 3 typical users are presented in Table 1, as an example of similarities and differences between Pocket PC use. 10 of the generally common activities are listed: reading, email, web browsing, notes, calendar, computer assisted learning, word processing, calculator, music, games. Each user also performed a few additional tasks in other categories, not shown (e.g. MSN Messenger, Excel, viewing lecture slides).

Table 1: Activities and location of use of Pocket PC by 3 students

| Location     | read | mail | web | note | cal | CAL | WP | calc | mus | game |
|--------------|------|------|-----|------|-----|-----|----|------|-----|------|
| B1 home      | 1    | 2    |     | 5    | 4   | 2   | 2  | 1    | 7   | 1    |
| EECE G16     | 1    | 2    | 1   | 4    | 1   |     |    | 1    |     |      |
| EECE 137     | 1    | 1    | 1   | 1    |     |     |    | 1    | 2   |      |
| EECE 421     | 1    | 1    |     |      |     |     |    |      | 1   |      |
| EECE 435     |      |      | 2   |      |     |     |    | 2    |     |      |
| EECE CR      | 1    | 3    | 3   |      |     |     |    |      |     |      |
| EECE lib     | 3    | 1    | 1   | 1    |     |     |    | 1    |     |      |
| main hb      |      |      | 3   | 1    | 1   |     |    |      |     |      |
| shop         |      |      | 4   |      |     | 1   |    |      |     |      |
| B2 home      | 1    | 4    | 3   | 1    | 4   | 2   | 2  | 7    | 3   |      |
| other home   | 1    | 1    |     | 1    |     | 1   |    | 1    |     |      |
| EECE 123     | 1    | 1    |     |      |     |     |    |      |     |      |
| EECE 337     | 5    |      |     |      |     |     |    | 1    |     |      |
| EECE 522     |      |      | 1   | 1    |     |     |    |      |     |      |
| EECE CR      | 1    |      |     |      |     |     |    |      |     |      |
| EECE lib     |      |      |     |      |     |     | 1  |      |     |      |
| EECE res     | 1    | 2    |     |      |     |     |    |      |     |      |
| campus       | 1    |      |     | 1    |     |     |    | 1    |     |      |
| restaurant   | 1    |      |     | 1    |     |     |    | 1    |     |      |
| train        | 3    |      |     |      |     |     |    | 1    | 1   |      |
| B3 home      | 1    | 1    |     | 20   | 4   | 2   |    | 4    | 8   |      |
| EECE 225     | 1    | 2    |     |      |     |     |    |      |     |      |
| EECE 337     | 2    |      |     |      |     |     |    |      |     |      |
| EECE 421     | 1    | 1    | 1   | 9    |     |     |    | 1    | 1   |      |
| learn centre |      |      | 1   | 1    |     |     |    |      |     |      |

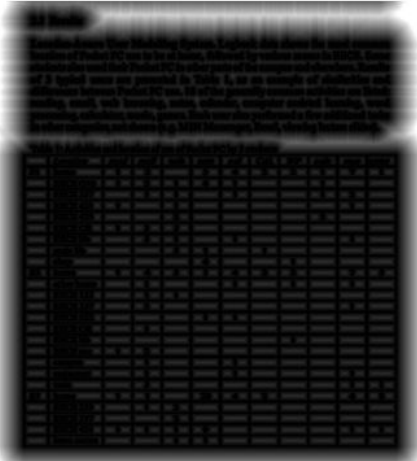

## Result:-

南京市建邺区高科技投资集团有限公司 2018 年度第三期超短期融资券募集说明书

| 债权单位名称         | 金额        | 占比%   | 款项性质     | 是否关联方 |
|----------------|-----------|-------|----------|-------|
| 江苏省糖烟酒总公司      | 12,251.20 | 26.09 | 预收研发园购房款 | 否     |
| 南京凯盛开能环保能源有限公司 | 10,700.00 | 22.79 | 预收研发园购房款 | 否     |
| 南京凯盛自控工程有限公司   | 5,300.00  | 11.29 | 预收研发园购房款 | 否     |
| 南京公用发展股份有限公司   | 4,663.20  | 9.93  | 预收研发园购房款 | 否     |
| 南京路灯工程建设有限责任公司 | 3,595.20  | 7.66  | 预收研发园购房款 | 否     |
| 合计             | 36,509.60 | 77.76 |          |       |

图表 6-29：截至 2018 年 9 月末发行人预收款项账龄结构情况

| 账龄    | 金额        | 比例%   |
|-------|-----------|-------|
| 1 年以内 | 4,327.04  | 9.21  |
| 1-2 年 | 9,588.56  | 20.42 |
| 2-3 年 | 14,930.80 | 31.80 |
| 3 年以上 | 18,111.10 | 38.57 |
| 合 计   | 46,361.87 | 100   |

### (5) 其他应付款：

近三年又一期末,发行人其他应付款余额为 69,377.45 万元、44,690.56 万元、29,707.04 和 99,165.11 万元,占负债总额的比例为 3.73%、2.41%、1.75%和 5.12%,均为与非关联企业的往来款。

根据新的财务报表要求,其他应付款中包含应付利息。2018 年 9 月末,发行人其他应付款余额为 99,165.11 万元,其中应付利息为 8,746 万元,其他应付款实际较年初增加 60,712.07 万元,主要是新增非关联企业的往来款。

Table 2.1. Top 20 countries in online service delivery

| Country              | Online Service Index |
|----------------------|----------------------|
| France               | 1.0000               |
| Singapore            | 0.9921               |
| Republic of Korea    | 0.9764               |
| Japan                | 0.9449               |
| Spain                | 0.9449               |
| United States        | 0.9449               |
| Bahrain              | 0.9370               |
| Australia            | 0.9291               |
| Netherlands          | 0.9291               |
| Canada               | 0.9134               |
| United Kingdom       | 0.8976               |
| United Arab Emirates | 0.8819               |
| Israel               | 0.8740               |
| Uruguay              | 0.8504               |
| New Zealand          | 0.8425               |
| Chile                | 0.8189               |
| Colombia             | 0.7874               |
| Estonia              | 0.7717               |
| Finland              | 0.7717               |
| Saudi Arabia         | 0.7717               |

#### Box 2.1. France public service—commitment to continuous improvement

Taking the top place in the 2014 Online Service Index, France scores well across all practice areas and stages of online service development due to ongoing action to improve the quality of public services, integrate governmental websites and encourage consultation with citizens on both public policy and service delivery methods. The official website of the national administration ([service-public.fr](http://service-public.fr)) directs individuals, businesses and associations to relevant services by event as well as by subject, invites ideas about administrative simplification, connects citizens with current debates and consultations and facilitates interaction with government through single sign-on.

A leader in the field, France has also committed to further expanding online public service delivery while containing costs by reviewing free alternatives to commercial ICT infrastructure and applications in a systematic fashion and expanding the use of open source software. The new policy, introduced in 2012, aims to lower ICT expenditures and improve agility while encouraging innovation and engagement of other actors, such as local authorities and developer communities, in e-service co-production.<sup>1</sup>

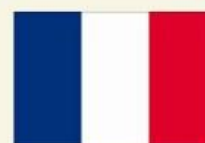

Source: [http://circulaire.legifrance.gouv.fr/pdf/2012/09/cir\\_35837.pdf](http://circulaire.legifrance.gouv.fr/pdf/2012/09/cir_35837.pdf). Accessed 29 October 2013.

**Table 6.** Average time in seconds used for B&B Stage1 and for GP Stage. The time spend in each stage increases in proportion to the size of the training set.

| Problem  | GP-35      |          | GP-15      |          | GP-5       |          | Ratio |
|----------|------------|----------|------------|----------|------------|----------|-------|
|          | B&B Stage1 | GP Stage | B&B Stage1 | GP Stage | B&B Stage1 | GP Stage |       |
| Pres11ab | 1.37       | 0.00     | 1.37       | 0.00     | 1.37       | 0.00     | 1.00  |
| Pres11ab | 1.37       | 0.00     | 1.37       | 0.00     | 1.37       | 0.00     | 1.00  |
| fit11    | 3.21       | 0.00     | 3.21       | 0.00     | 3.21       | 0.00     | 1.00  |
| fit11    | 3.21       | 0.00     | 3.21       | 0.00     | 3.21       | 0.00     | 1.00  |
| rcs11    | 4.68       | 0.00     | 4.68       | 0.00     | 4.68       | 0.00     | 1.00  |
| rcs11    | 4.68       | 0.00     | 4.68       | 0.00     | 4.68       | 0.00     | 1.00  |
| rcs21    | 5.38       | 0.00     | 5.38       | 0.00     | 5.38       | 0.00     | 1.00  |
| rcs21    | 5.38       | 0.00     | 5.38       | 0.00     | 5.38       | 0.00     | 1.00  |
| rt2      | 5.58       | 0.00     | 5.58       | 0.00     | 5.58       | 0.00     | 1.00  |
| rt2      | 5.58       | 0.00     | 5.58       | 0.00     | 5.58       | 0.00     | 1.00  |
| ms110    | 5.19       | 0.00     | 5.19       | 0.00     | 5.19       | 0.00     | 1.00  |
| ms110    | 5.19       | 0.00     | 5.19       | 0.00     | 5.19       | 0.00     | 1.00  |
| rcs11e3  | 6.08       | 0.00     | 6.08       | 0.00     | 6.08       | 0.00     | 1.00  |
| rcs11e3  | 6.08       | 0.00     | 6.08       | 0.00     | 6.08       | 0.00     | 1.00  |
| p275t    | 5.69       | 0.00     | 5.69       | 0.00     | 5.69       | 0.00     | 1.00  |
| p275t    | 5.69       | 0.00     | 5.69       | 0.00     | 5.69       | 0.00     | 1.00  |
| rk1      | 5.71       | 0.00     | 5.71       | 0.00     | 5.71       | 0.00     | 1.00  |
| rk1      | 5.71       | 0.00     | 5.71       | 0.00     | 5.71       | 0.00     | 1.00  |
| rcs      | 5.95       | 0.00     | 5.95       | 0.00     | 5.95       | 0.00     | 1.00  |
| rcs      | 5.95       | 0.00     | 5.95       | 0.00     | 5.95       | 0.00     | 1.00  |
| rcs1     | 6.06       | 0.00     | 6.06       | 0.00     | 6.06       | 0.00     | 1.00  |
| rcs1     | 6.06       | 0.00     | 6.06       | 0.00     | 6.06       | 0.00     | 1.00  |
| rcs11i   | 5.40       | 0.00     | 5.40       | 0.00     | 5.40       | 0.00     | 1.00  |
| rcs11i   | 5.40       | 0.00     | 5.40       | 0.00     | 5.40       | 0.00     | 1.00  |
| rcs2     | 1.08       | 0.00     | 1.08       | 0.00     | 1.08       | 0.00     | 1.00  |
| rcs2     | 1.08       | 0.00     | 1.08       | 0.00     | 1.08       | 0.00     | 1.00  |

Table 5 depicts the best and worst solutions obtained by each GP setup and Table 6 shows how the size of the training set affects the time spent in B&B Stage1 and in GP Stage. It is worth mentioning that GP-35, supported by a larger training set, manages to do best despite the significantly less time spent in B&B Stage2<sup>6</sup>, in comparison to all other methods.

### 7 Conclusions and Further Research

We used Genetic Programming as a component in a Branch and Bound framework, where GP is utilized for generating the node selection heuristic for MIP. We believe that the experimental results obtained by our prototype implementation show that the hybrid B&B-GP approach we introduce portrays significant potential: supported by a properly constructed training set of adequate size, problem-instance specific heuristics can be evolved, capable of consistently guiding B&B towards promising areas of the search space.

Concerning our future research efforts, these will be directed in two fronts: The first one is to incorporate multiple GP Stages in our design, as well as to experiment with more elaborate GP structures and techniques like ADFs and Interval Arithmetic. The second one will be to increase our understanding of how the training set construction method adopted in the GP Stage affects the search in B&B Stage2. In addition to the above, we would like to apply our approach to more domains where B&B heuristic-based search is used.

### References

1. Michalewicz, Z., Fogel, D.B.: How to Solve it: Modern Heuristics. Springer-Verlag (2002)

<sup>6</sup> The duration of B&B Stage2 equals the total run time minus the duration of B&B Stage1 and of GP Stage.



有色金属价格及涨跌幅 (元/克, 元/千克, 美元/盎司)

| 贵金属品种    | 现价      | 本周涨跌幅 (%) | 本月涨跌幅 (%) | 年初至今涨跌幅 (%) |
|----------|---------|-----------|-----------|-------------|
| SHFE 黄金  | 284.8   | 1.50      | 2.24      | 2.48        |
| SHFE 白银  | 3.591   | 0.31      | 2.10      | 7.47        |
| COMEX 黄金 | 1,259.1 | 1.43      | 2.33      | 2.93        |
| COMEX 白银 | 14.7    | 0.40      | 2.03      | 13.37       |
| 美元指数     | 96.95   | -0.50     | -0.25     | 5.08        |

资料来源: wind, 中国银河证券研究院

图 21: SHFE 黄金价格及库存

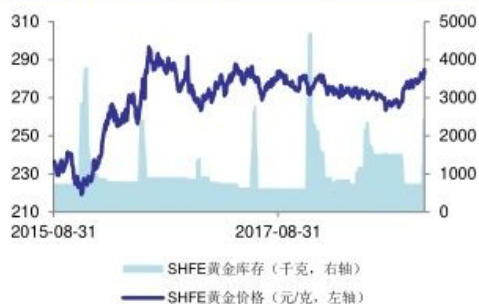

资料来源: Wind, 中国银河证券研究院

图 22: COMEX 黄金价格及库存

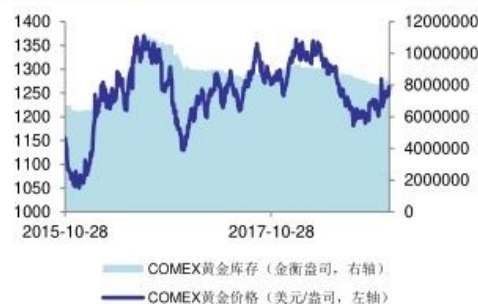

资料来源: Wind, 中国银河证券研究院

图 23: SHFE 白银价格及库存

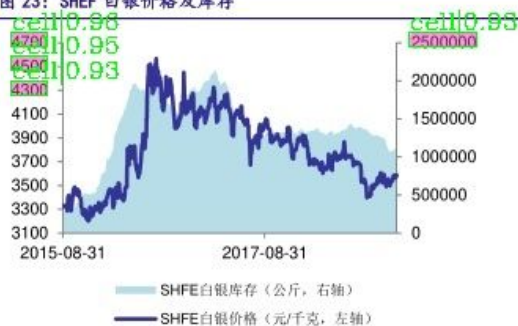

资料来源: Wind, 中国银河证券研究院

图 24: COMEX 白银价格及库存

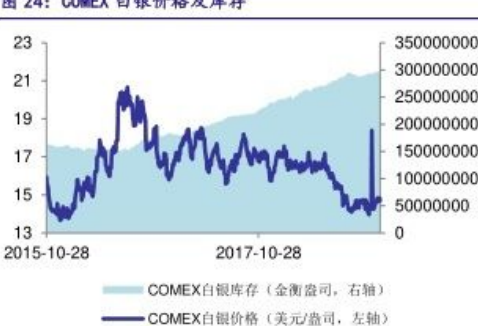

资料来源: Wind, 中国银河证券研究院

## FINANCIAL INFORMATION

relatively high level in 2011, while our pre-sales encountered tightened real estate regulations, and (ii) four projects were located in county-level towns of Zhejiang and Jiangsu provinces, which were mostly affected by tightening regulations. From 2013 to 2014, we adjusted our land acquisition strategy by shifting our investment focus to key cities in Zhejiang Province, such as Hangzhou and Wenzhou, and recognized increasing gross profit margin from 2016 onward.

### Other Income and Other Gains – Net

Our other income primarily consists of income from the management and consulting services that we provided to the Group's joint ventures and associates in relation to property development projects. The management and consulting services provided by us mainly include project procurement, cost management, product development, human resources management, planned operations management, financial management and other services. Our clients are mainly our Group's joint ventures and associates, such as Zhejiang Dexin Dongcheng Property Co., Ltd.\* (浙江德信東城置業有限公司), Hangzhou Binrun Real Estate Development Co., Ltd.\* (杭州濱潤房地產開發有限公司), Zhejiang Jinao Real Estate Co., Ltd.\* (浙江金澳置業有限公司), and Zhejiang Hongning Real Estate Co., Ltd.\* (浙江鴻寧置業有限公司). The relevant income is determined based on the type of services we provided to our clients and mutual agreement of both parties, and in general with reference to certain proportion of the total contracted sales of the relevant property development projects.

Our other gains – net primarily include realised and unrealised gains on financial assets at fair value through profit or loss and gains on disposal of subsidiaries.

The following tables set forth our other income and other net gains for the periods indicated.

#### Other Income

|                                          | Year ended December 31, |               |               | Nine months ended September 30, |               |
|------------------------------------------|-------------------------|---------------|---------------|---------------------------------|---------------|
|                                          | 2015                    | 2016          | 2017          | 2017                            | 2018          |
|                                          | RMB'000                 | RMB'000       | RMB'000       | RMB'000                         | RMB'000       |
|                                          |                         |               |               | (Unaudited)                     |               |
| Management and consulting service income | 20,881                  | 65,515        | 60,328        | 34,281                          | 15,385        |
| Others                                   | 3,207                   | 2,886         | 2,212         | 1,056                           | 2,500         |
| <b>Total</b>                             | <b>24,088</b>           | <b>69,504</b> | <b>62,540</b> | <b>35,337</b>                   | <b>17,885</b> |

#### Other Gains – Net

|                                                                | Year ended December 31, |              |               | Nine months ended September 30, |               |
|----------------------------------------------------------------|-------------------------|--------------|---------------|---------------------------------|---------------|
|                                                                | 2015                    | 2016         | 2017          | 2017                            | 2018          |
|                                                                | RMB'000                 | RMB'000      | RMB'000       | RMB'000                         | RMB'000       |
|                                                                |                         |              |               | (Unaudited)                     |               |
| Gains on financial assets at fair value through profit or loss | 2,076                   | 5,506        | 20,520        | 13,800                          | 6,328         |
| Gains on disposal of subsidiaries                              | 6,159                   | -            | -             | -                               | 30,018        |
| Exchange gain                                                  | -                       | 1,401        | -             | 1,189                           | 10,388        |
| Others                                                         | 285                     | 1,401        | 314           | 1,189                           | 4,213         |
| <b>Total</b>                                                   | <b>8,520</b>            | <b>6,907</b> | <b>20,834</b> | <b>14,989</b>                   | <b>51,046</b> |
